# Supplementary material for: Molecular Diversity of Glutamatergic and GABAergic Synapses from Multiplexed Fluorescence Imaging
Source: PubMed Central journal article supplement (PMC7877457; doi:10.1523/eneuro.0286-20.2020), 2021-01-15
Supplement: enu-eN-MNT-0286-20-s02.pdf [file enu-eN-MNT-0286-20-s02.pdf]

**Figure 1-2** Synaptic properties measured by CellProfiler.

| <b>Type</b> | <b>Name</b>               | <b>Description</b>                                                                                         |
|-------------|---------------------------|------------------------------------------------------------------------------------------------------------|
| Intensity   | Integrated intensity      | The sum of the pixel intensities of an object                                                              |
|             | Mean intensity            | The average pixel intensity of an object                                                                   |
|             | Std intensity             | The standard deviation of the pixel values of an object                                                    |
|             | Max intensity             | The maximal pixel intensity of an object                                                                   |
|             | Min intensity             | The minimal pixel intensity of an object.                                                                  |
|             | Integrated intensity edge | The sum of the edge pixel intensities of an object.                                                        |
|             | Mean intensity edge       | The average edge pixel intensity of an object                                                              |
|             | Std intensity edge        | The standard deviation of the edge pixel values of an object                                               |
|             | Max intensity edge        | The maximal edge pixel intensity of an object                                                              |
|             | Min intensity edge        | The minimal edge pixel intensity of an object                                                              |
|             | Mass displacement         | The distance between the centers of gravity in the gray-level and the binary representations of the object |

|       |                          |                                                                                                                             |
|-------|--------------------------|-----------------------------------------------------------------------------------------------------------------------------|
|       | Lower quartile intensity | The intensity value of the pixel for which 25% of the pixels in the object have lower values                                |
|       | Median intensity         | The median intensity value within the object                                                                                |
|       | MAD intensity            | The median absolute deviation (MAD), defined as the median ( $ x_i - \text{median}(x) $ ), of the intensities in the object |
|       | Upper quartile intensity | The intensity value of the pixel for which 75% of the pixels in the object have lower values                                |
| Shape | Area                     | The number of pixels in the object                                                                                          |
|       | Perimeter                | The number of pixels on the boundary of each object                                                                         |
|       | Form factor              | $4\pi \times \text{Area} / \text{Perimeter}^2$                                                                              |
|       | Solidity                 | The proportion of pixels in both the convex hull and object                                                                 |
|       | Extent                   | The proportion of pixels in the bounding box and the object                                                                 |
|       | Euler number             | The contained object number minus the number of holes                                                                       |
|       | Eccentricity             | The ellipse eccentricity with the same second-moment                                                                        |

|               |                            |                                                                                                                 |
|---------------|----------------------------|-----------------------------------------------------------------------------------------------------------------|
|               | Axis length (major, minor) | The length of the major/minor axis of the ellipse with the same normalized second central moments as the object |
|               | Orientation                | The angle between the x-axis and the major axis of the ellipse with the same second-moments as the object       |
|               | Compactness                | The mean squared distance of the object's pixels from the centroid divided by the area.                         |
|               | Maximum radius             | The maximum distance of any pixel in the object to the closest pixel outside of the object                      |
|               | Median radius              | The median distance of any pixel in the object to the closest pixel outside of the object                       |
|               | Mean radius                | The mean distance of any pixel in the object to the closest pixel outside of the object                         |
|               | Feret diameter (min,max)   | The distance between two parallel lines tangent on either side of the object                                    |
| Distance      | Centroid                   | The distance between the centroids of two objects                                                               |
|               | Minimum                    | The minimum distance between two objects                                                                        |
| Object number | Children                   | The number of objects of that overlap with another object                                                       |
